# Supplementary material for: Pediatric and Adult Patients with ME/CFS following COVID-19: A Structured Approach to Diagnosis Using the Munich Berlin Symptom Questionnaire (MBSQ)
Source: bioRxiv or medRxiv preprint supplement (doi:10.1101/2023.08.23.23293081), 2023-08-24
Supplement: Supplementary file [file media-1.pdf]

|                                                                                                         | During the last 6 months |                                                                                             |   |                                                                       | Physician's notes |   |   |   |   |        |
|---------------------------------------------------------------------------------------------------------|--------------------------|---------------------------------------------------------------------------------------------|---|-----------------------------------------------------------------------|-------------------|---|---|---|---|--------|
|                                                                                                         | Not present              | Frequency<br>1 = sometimes<br>2 = about ½ of the time<br>3 = most of the time<br>4 = always |   | Severity<br>1 = mild<br>2 = moderate<br>3 = severe<br>4 = very severe |                   |   |   |   |   |        |
| 23 Orientation problems                                                                                 | 0                        | 1                                                                                           | 2 | 3                                                                     | 4                 | 1 | 2 | 3 | 4 |        |
| 24 Comprehension problems                                                                               | 0                        | 1                                                                                           | 2 | 3                                                                     | 4                 | 1 | 2 | 3 | 4 |        |
| 25 Word-finding problems                                                                                | 0                        | 1                                                                                           | 2 | 3                                                                     | 4                 | 1 | 2 | 3 | 4 |        |
| 26 If cognitive symptoms (V.20-25) are present, do they worsen due to effort / stress or time pressure? |                          |                                                                                             |   |                                                                       |                   |   |   |   |   | Yes No |
| 27 Perceptual and sensory disturbances, e.g., blurred vision                                            | 0                        | 1                                                                                           | 2 | 3                                                                     | 4                 | 1 | 2 | 3 | 4 |        |
| 28 Coordination problems                                                                                | 0                        | 1                                                                                           | 2 | 3                                                                     | 4                 | 1 | 2 | 3 | 4 |        |
| 29 Muscle twitches                                                                                      | 0                        | 1                                                                                           | 2 | 3                                                                     | 4                 | 1 | 2 | 3 | 4 |        |
| 30 Muscle weakness                                                                                      | 0                        | 1                                                                                           | 2 | 3                                                                     | 4                 | 1 | 2 | 3 | 4 |        |
| 31 Overload phenomena - hypersensitivity to (bright) light                                              | 0                        | 1                                                                                           | 2 | 3                                                                     | 4                 | 1 | 2 | 3 | 4 |        |
| 32 Overload phenomena - hypersensitivity to noise                                                       | 0                        | 1                                                                                           | 2 | 3                                                                     | 4                 | 1 | 2 | 3 | 4 |        |
| 33 Overload phenomena - hypersensitivity to touch                                                       | 0                        | 1                                                                                           | 2 | 3                                                                     | 4                 | 1 | 2 | 3 | 4 |        |
| 34 Overload phenomena – emotional overload                                                              | 0                        | 1                                                                                           | 2 | 3                                                                     | 4                 | 1 | 2 | 3 | 4 |        |

| VI Autonomic Manifestations                         |   |   |   |   |   |   |   |   |   |  |
|-----------------------------------------------------|---|---|---|---|---|---|---|---|---|--|
| 35 Dizziness                                        | 0 | 1 | 2 | 3 | 4 | 1 | 2 | 3 | 4 |  |
| 36 Palpitations with or without cardiac arrhythmias | 0 | 1 | 2 | 3 | 4 | 1 | 2 | 3 | 4 |  |
| 37 Circulatory problems when getting up             | 0 | 1 | 2 | 3 | 4 | 1 | 2 | 3 | 4 |  |
| 38 Circulatory problems in an upright posture       | 0 | 1 | 2 | 3 | 4 | 1 | 2 | 3 | 4 |  |
| 39 Unusual paleness                                 | 0 | 1 | 2 | 3 | 4 | 1 | 2 | 3 | 4 |  |
| 40 Bladder problems                                 | 0 | 1 | 2 | 3 | 4 | 1 | 2 | 3 | 4 |  |
| 41 Gastrointestinal problems                        | 0 | 1 | 2 | 3 | 4 | 1 | 2 | 3 | 4 |  |
| 42 Exertional shortness of breath                   | 0 | 1 | 2 | 3 | 4 | 1 | 2 | 3 | 4 |  |

| VII Neuroendocrine Manifestations                                                                                                                             |   |   |   |   |   |   |   |   |   |  |
|---------------------------------------------------------------------------------------------------------------------------------------------------------------|---|---|---|---|---|---|---|---|---|--|
| 43 Loss of thermostatic stability (e.g., subnormal body temperature, and marked diurnal fluctuation, sweating episodes, feelings of feverishness, cold limbs) | 0 | 1 | 2 | 3 | 4 | 1 | 2 | 3 | 4 |  |
| 44 Intolerance of extremes hot and cold                                                                                                                       | 0 | 1 | 2 | 3 | 4 | 1 | 2 | 3 | 4 |  |
| 45 Marked weight change – loss of appetite or abnormal appetite                                                                                               | 0 | 1 | 2 | 3 | 4 | 1 | 2 | 3 | 4 |  |
| 46 Worsening of symptoms with stress                                                                                                                          | 0 | 1 | 2 | 3 | 4 | 1 | 2 | 3 | 4 |  |

| VIII Immunologic Manifestations                       |   |   |   |   |   |   |   |   |   |  |
|-------------------------------------------------------|---|---|---|---|---|---|---|---|---|--|
| 47 Flu like symptoms / general malaise                | 0 | 1 | 2 | 3 | 4 | 1 | 2 | 3 | 4 |  |
| 48 Painful lymph nodes                                | 0 | 1 | 2 | 3 | 4 | 1 | 2 | 3 | 4 |  |
| 49 Recurrent sore throat                              | 0 | 1 | 2 | 3 | 4 | 1 | 2 | 3 | 4 |  |
| 50 New sensitivities to food, medication or chemicals | 0 | 1 | 2 | 3 | 4 | 1 | 2 | 3 | 4 |  |

| Further Questions About the Symptom Course                                         |  |  |  |  |  |  |  |  |  |  |
|------------------------------------------------------------------------------------|--|--|--|--|--|--|--|--|--|--|
| If there are any symptoms, what are the three main symptoms of this questionnaire? |  |  |  |  |  |  |  |  |  |  |
| 1.....                                                                             |  |  |  |  |  |  |  |  |  |  |
| 2.....                                                                             |  |  |  |  |  |  |  |  |  |  |
| 3.....                                                                             |  |  |  |  |  |  |  |  |  |  |

For evaluation of this questionnaire please use the supplementary scoring sheet for adults.

**Munich Berlin Symptom Questionnaire (MBSQ) – Questionnaire for Pediatric and Adolescent Patients**

|                           |                        |
|---------------------------|------------------------|
| Surname:                  | Name (physician):      |
| Name:                     | Date (physician):      |
| Date of birth:            | Institution:           |
| Today's date:             | Date of disease onset: |
| Completion time:      min |                        |

*For patients:* Please complete this questionnaire on your own as far as possible. If necessary, ask your parents to help you.

*For doctors:* This questionnaire has to be used in **medical interview**. Open **questions** and comprehensive **problems** should be clarified in a **medical visit**. The medical **evaluation** of this questionnaire has to be based on the **supplementary scoring sheet for adults**. ME/CFS is a **clinical diagnosis**. The diagnosis cannot be established without appropriate **differential diagnostics**.

|                                   | During the last 3 months                                                |                                                                                             |   |   | Physician's notes |                                                                       |    |   |   |  |
|-----------------------------------|-------------------------------------------------------------------------|---------------------------------------------------------------------------------------------|---|---|-------------------|-----------------------------------------------------------------------|----|---|---|--|
|                                   | Is not present                                                          | Frequency<br>1 = sometimes<br>2 = about ½ of the time<br>3 = most of the time<br>4 = always |   |   |                   | Severity<br>1 = mild<br>2 = moderate<br>3 = severe<br>4 = very severe |    |   |   |  |
| <b>I Fatigue / Daily Function</b> |                                                                         |                                                                                             |   |   |                   |                                                                       |    |   |   |  |
| 1                                 | 0                                                                       | 1                                                                                           | 2 | 3 | 4                 | 1                                                                     | 2  | 3 | 4 |  |
| 2                                 | 0                                                                       | 1                                                                                           | 2 | 3 | 4                 | 1                                                                     | 2  | 3 | 4 |  |
| 3                                 | 0                                                                       | 1                                                                                           | 2 | 3 | 4                 | 1                                                                     | 2  | 3 | 4 |  |
| 4                                 | 0                                                                       | 1                                                                                           | 2 | 3 | 4                 | 1                                                                     | 2  | 3 | 4 |  |
| 5                                 | If fatigue is present, did it start new or at a definable time?         |                                                                                             |   |   |                   | Yes                                                                   | No |   |   |  |
| 6                                 | If fatigue is present, is it the result of ongoing, excessive exertion? |                                                                                             |   |   |                   | Yes                                                                   | No |   |   |  |
| 7                                 | If fatigue is present, is it alleviated by rest?                        |                                                                                             |   |   |                   | Yes                                                                   | No |   |   |  |

| <b>II Post-Exertional Symptoms</b> |                                                                                                                 |   |           |   |          |                            |   |   |   |  |
|------------------------------------|-----------------------------------------------------------------------------------------------------------------|---|-----------|---|----------|----------------------------|---|---|---|--|
| 8                                  | 0                                                                                                               | 1 | 2         | 3 | 4        | 1                          | 2 | 3 | 4 |  |
| 9                                  | 0                                                                                                               | 1 | 2         | 3 | 4        | 1                          | 2 | 3 | 4 |  |
| 10                                 | O ≤ 1 h                                                                                                         |   | O 2-3 h   |   | O 4-10 h |                            |   |   |   |  |
|                                    | O 11-13 h                                                                                                       |   | O 14-23 h |   | O ≥ 24 h |                            |   |   |   |  |
| 11                                 | If post-exertional symptoms are present, which three mild daily activities lead to a worsening of the symptoms? |   |           |   |          | 1.....<br>2.....<br>3..... |   |   |   |  |
| 12                                 | If post-exertional symptoms are present, which three symptoms worsen after mild daily activities?               |   |           |   |          | 1.....<br>2.....<br>3..... |   |   |   |  |

|                  | During the last 3 months |                                                                                             |   |   | Physician's notes |                                                                       |   |   |   |  |
|------------------|--------------------------|---------------------------------------------------------------------------------------------|---|---|-------------------|-----------------------------------------------------------------------|---|---|---|--|
|                  | Not present              | Frequency<br>1 = sometimes<br>2 = about ½ of the time<br>3 = most of the time<br>4 = always |   |   |                   | Severity<br>1 = mild<br>2 = moderate<br>3 = severe<br>4 = very severe |   |   |   |  |
| <b>III Sleep</b> |                          |                                                                                             |   |   |                   |                                                                       |   |   |   |  |
| 13               | 0                        | 1                                                                                           | 2 | 3 | 4                 | 1                                                                     | 2 | 3 | 4 |  |
| 14               | 0                        | 1                                                                                           | 2 | 3 | 4                 | 1                                                                     | 2 | 3 | 4 |  |
| 15               | 0                        | 1                                                                                           | 2 | 3 | 4                 | 1                                                                     | 2 | 3 | 4 |  |
| 16               | 0                        | 1                                                                                           | 2 | 3 | 4                 | 1                                                                     | 2 | 3 | 4 |  |
| 17               | 0                        | 1                                                                                           | 2 | 3 | 4                 | 1                                                                     | 2 | 3 | 4 |  |

| <b>IV Pain</b> |   |   |   |   |   |   |   |   |   |  |
|----------------|---|---|---|---|---|---|---|---|---|--|
| 18             | 0 | 1 | 2 | 3 | 4 | 1 | 2 | 3 | 4 |  |
| 19             | 0 | 1 | 2 | 3 | 4 | 1 | 2 | 3 | 4 |  |
| 20             | 0 | 1 | 2 | 3 | 4 | 1 | 2 | 3 | 4 |  |
| 21             | 0 | 1 | 2 | 3 | 4 | 1 | 2 | 3 | 4 |  |

|                                        | During the last 3 months |                                                                                             |                                                                       |  | Physician's notes |
|----------------------------------------|--------------------------|---------------------------------------------------------------------------------------------|-----------------------------------------------------------------------|--|-------------------|
|                                        | Not present              | Frequency<br>1 = sometimes<br>2 = about ½ of the time<br>3 = most of the time<br>4 = always | Severity<br>1 = mild<br>2 = moderate<br>3 = severe<br>4 = very severe |  |                   |
| <b>V Neurocognitive Manifestations</b> |                          |                                                                                             |                                                                       |  |                   |
| 22 Confusion                           | 0                        | 1 2 3 4                                                                                     | 1 2 3 4                                                               |  |                   |
| 23 Slowness of thought                 | 0                        | 1 2 3 4                                                                                     | 1 2 3 4                                                               |  |                   |
| 24 Concentration problems              | 0                        | 1 2 3 4                                                                                     | 1 2 3 4                                                               |  |                   |
| 25 Memory problems                     | 0                        | 1 2 3 4                                                                                     | 1 2 3 4                                                               |  |                   |
| 26 Orientation problems                | 0                        | 1 2 3 4                                                                                     | 1 2 3 4                                                               |  |                   |
| 27 Comprehension problems              | 0                        | 1 2 3 4                                                                                     | 1 2 3 4                                                               |  |                   |
| 28 Word-finding problems               | 0                        | 1 2 3 4                                                                                     | 1 2 3 4                                                               |  |                   |

|                                                                                                         |     |    |  |
|---------------------------------------------------------------------------------------------------------|-----|----|--|
| 29 If cognitive symptoms (V.23-28) are present, do they worsen due to Effort / stress or time pressure? | Yes | No |  |
|---------------------------------------------------------------------------------------------------------|-----|----|--|

|                                                              |   |         |         |  |
|--------------------------------------------------------------|---|---------|---------|--|
| 30 Absent mindedness                                         | 0 | 1 2 3 4 | 1 2 3 4 |  |
| 31 Difficulty recalling information                          | 0 | 1 2 3 4 | 1 2 3 4 |  |
| 32 Need to focus on one thing at a time                      | 0 | 1 2 3 4 | 1 2 3 4 |  |
| 33 Trouble expressing thought                                | 0 | 1 2 3 4 | 1 2 3 4 |  |
| 34 Lose train of thought                                     | 0 | 1 2 3 4 | 1 2 3 4 |  |
| 35 New troubles with math or other educational subjects      | 0 | 1 2 3 4 | 1 2 3 4 |  |
| 36 Perceptual and sensory disturbances, e.g., blurred vision | 0 | 1 2 3 4 | 1 2 3 4 |  |
| 37 Coordination problems                                     | 0 | 1 2 3 4 | 1 2 3 4 |  |
| 38 Muscle twitches                                           | 0 | 1 2 3 4 | 1 2 3 4 |  |
| 39 Muscle weakness                                           | 0 | 1 2 3 4 | 1 2 3 4 |  |
| 40 Overload phenomena - hypersensitivity to (bright) light   | 0 | 1 2 3 4 | 1 2 3 4 |  |
| 41 Overload phenomena - hypersensitivity to noise            | 0 | 1 2 3 4 | 1 2 3 4 |  |
| 42 Overload phenomena - hypersensitivity to touch            | 0 | 1 2 3 4 | 1 2 3 4 |  |
| 43 Overload phenomena – emotional overload                   | 0 | 1 2 3 4 | 1 2 3 4 |  |

| <b>VI Autonomic Manifestations</b>                  |   |         |         |  |
|-----------------------------------------------------|---|---------|---------|--|
| 44 Dizziness                                        | 0 | 1 2 3 4 | 1 2 3 4 |  |
| 45 Palpitations with or without cardiac arrhythmias | 0 | 1 2 3 4 | 1 2 3 4 |  |
| 46 Circulatory problems when getting up             | 0 | 1 2 3 4 | 1 2 3 4 |  |
| 47 Circulatory problems in upright posture          | 0 | 1 2 3 4 | 1 2 3 4 |  |
| 48 Unusual paleness                                 | 0 | 1 2 3 4 | 1 2 3 4 |  |
| 49 Bladder problems                                 | 0 | 1 2 3 4 | 1 2 3 4 |  |
| 50 Gastrointestinal problems                        | 0 | 1 2 3 4 | 1 2 3 4 |  |
| 51 Exertional shortness of breath                   | 0 | 1 2 3 4 | 1 2 3 4 |  |

| <b>VII Neuroendocrine Manifestations</b>                                                                                                                      |   |         |         |  |
|---------------------------------------------------------------------------------------------------------------------------------------------------------------|---|---------|---------|--|
| 52 Loss of thermostatic stability (e.g., subnormal body temperature, and marked diurnal fluctuation, sweating episodes, feelings of feverishness, cold limbs) | 0 | 1 2 3 4 | 1 2 3 4 |  |
| 53 Intolerance of extremes hot and cold                                                                                                                       | 0 | 1 2 3 4 | 1 2 3 4 |  |
| 54 Marked weight change – loss of appetite or abnormal appetite                                                                                               | 0 | 1 2 3 4 | 1 2 3 4 |  |
| 55 Worsening of symptoms with stress                                                                                                                          | 0 | 1 2 3 4 | 1 2 3 4 |  |

| <b>VIII Immunologic Manifestations</b>                |   |         |         |  |
|-------------------------------------------------------|---|---------|---------|--|
| 56 Flu like symptoms / general malaise                | 0 | 1 2 3 4 | 1 2 3 4 |  |
| 57 Painful lymph nodes                                | 0 | 1 2 3 4 | 1 2 3 4 |  |
| 58 Fever                                              | 0 | 1 2 3 4 | 1 2 3 4 |  |
| 59 Recurrent sore throat                              | 0 | 1 2 3 4 | 1 2 3 4 |  |
| 60 New sensitivities to food, medication or chemicals | 0 | 1 2 3 4 | 1 2 3 4 |  |

| <b>Further Questions About the Symptom Course</b>                                  |                            |
|------------------------------------------------------------------------------------|----------------------------|
| If there are any symptoms, what are the three main symptoms of this questionnaire? | 1.....<br>2.....<br>3..... |

## Munich Berlin Symptom Questionnaire – Scoring Sheet for Adults (≥ 18 Years of Age)

Only if frequency and severity are reported with ≥2, the respective item counts positively for evaluation.

Surname:  
 Name:  
 Date of birth:  
 Today's date:

Surname (physician):  
 Name (physician):  
 Date (physician):  
 Institution:

| Canadian Consensus Criteria <sup>1</sup> |                                                                                                                                                                                                                                                                                                                                                                                                                                                                                                                    | IOM Criteria <sup>2</sup> |                                                                                                                                                                                                                                                                                                                                                                                                                        |
|------------------------------------------|--------------------------------------------------------------------------------------------------------------------------------------------------------------------------------------------------------------------------------------------------------------------------------------------------------------------------------------------------------------------------------------------------------------------------------------------------------------------------------------------------------------------|---------------------------|------------------------------------------------------------------------------------------------------------------------------------------------------------------------------------------------------------------------------------------------------------------------------------------------------------------------------------------------------------------------------------------------------------------------|
| <b>O</b>                                 | <b>Duration of Illness (Onset of the Symptoms: ____ . ____ . ____ )</b><br>The symptomatology is present for at least <b>6 months</b> .                                                                                                                                                                                                                                                                                                                                                                            | <b>O</b>                  | <b>Duration of Illness (Onset of the Symptoms: ____ . ____ . ____ )</b><br>The symptomatology is present for at least <b>6 months</b> .                                                                                                                                                                                                                                                                                |
| <b>O</b>                                 | <b>Medical History, Physical Examination, and Differential Diagnostics</b><br><input type="checkbox"/> did not indicate any other cause for the symptoms<br><i>(in particular, no indications for Addison's disease, Cushing's disease, hypo-/hyperthyroidism, anemia, hemochromatosis, diabetes mellitus, haemato-oncological, rheumatological and treatable sleep disorders)</i><br><br><input type="checkbox"/> The symptoms must have begun or have been significantly altered after the onset of the illness. | <b>O</b>                  | <b>Medical History, Physical Examination, and Differential Diagnostics</b><br><input type="checkbox"/> did not indicate any other cause for the symptoms<br><br><input type="checkbox"/> The symptoms must have begun or have been significantly altered after the onset of the illness.                                                                                                                               |
| <b>O</b>                                 | <b>Fatigue / Daily Function</b><br>All of the following points must apply:<br><input type="checkbox"/> Fatigue: <b>I.1</b> ≥2<br><input type="checkbox"/> Limitations: at least 1 of the 3 points <b>I.2</b> ≥2<br><input type="checkbox"/> Fatigue new start: <b>I.3</b> Yes                                                                                                                                                                                                                                      | <b>O</b>                  | <b>Fatigue / Daily Function</b><br>All of the following points must apply:<br><input type="checkbox"/> Fatigue: <b>I.1</b> ≥2<br><input type="checkbox"/> Limitations: at least 1 of the 3 points <b>I.2</b> ≥2<br><input type="checkbox"/> Fatigue new start: <b>I.3</b> Yes<br><input type="checkbox"/> Fatigue due to exertion: <b>I.4</b> No<br><input type="checkbox"/> Fatigue alleviated by rest: <b>I.5</b> No |
| <b>O</b>                                 | <b>Post-Exertional Symptoms</b><br>All of the following points must apply:<br><input type="checkbox"/> loss of stamina; increased symptoms after everyday activities: all 2 points <b>II.6-7</b> ≥2<br><input type="checkbox"/> duration of worsening of symptoms: <b>II.8</b> ≥14 hours*                                                                                                                                                                                                                          | <b>O</b>                  | <b>Post-Exertional Symptoms</b><br>All of the following points must apply: all 2 points <b>II.6-7</b> ≥2                                                                                                                                                                                                                                                                                                               |
| <b>O</b>                                 | <b>Sleep</b><br>At least 1 of the following 5 points must apply: <b>III.11-15</b> ≥2                                                                                                                                                                                                                                                                                                                                                                                                                               | <b>O</b>                  | <b>Sleep</b><br>The following point must apply: <b>III.11</b> ≥2                                                                                                                                                                                                                                                                                                                                                       |

| Canadian Consensus Criteria <sup>1</sup> |                                                                                                                                                                                                                                                                                                                                                                                                                                                                                                                                                                                                                                                                                                                                                  | IOM Criteria <sup>2</sup> |                                                                                                                                                                                                                                                                                                                                                                                                                                                                                                                                                                                         |
|------------------------------------------|--------------------------------------------------------------------------------------------------------------------------------------------------------------------------------------------------------------------------------------------------------------------------------------------------------------------------------------------------------------------------------------------------------------------------------------------------------------------------------------------------------------------------------------------------------------------------------------------------------------------------------------------------------------------------------------------------------------------------------------------------|---------------------------|-----------------------------------------------------------------------------------------------------------------------------------------------------------------------------------------------------------------------------------------------------------------------------------------------------------------------------------------------------------------------------------------------------------------------------------------------------------------------------------------------------------------------------------------------------------------------------------------|
| <b>O</b>                                 | <b>Pain</b><br>At least 1 of the following 5 points must apply: <b>VI.16-18</b> ≥2                                                                                                                                                                                                                                                                                                                                                                                                                                                                                                                                                                                                                                                               |                           | <b>Pain</b><br><i>Not included in IOM criteria</i>                                                                                                                                                                                                                                                                                                                                                                                                                                                                                                                                      |
| <b>O</b>                                 | <b>Neurocognitive Manifestations</b><br>At least 2 of the following symptom groups must apply: <ul style="list-style-type: none"> <li><input type="checkbox"/> Confusion: <b>V.19</b> ≥2</li> <li><input type="checkbox"/> Concentration and/or Memory: 1 of the following 2 points: <b>V.21-22</b> ≥2</li> <li><input type="checkbox"/> Orientation: <b>V.23</b> ≥2</li> <li><input type="checkbox"/> Comprehension and/or word-finding: 1 of the following 2 points: <b>V.24-25</b> ≥2</li> <li><input type="checkbox"/> Perception and overload phenomena: 1 of the following 5 points: <b>V.27, V.31-34</b> ≥2</li> <li><input type="checkbox"/> Coordination and muscular system: 1 of the following 3 points: <b>V.28-30</b> ≥2</li> </ul> | <b>O</b>                  | <b>Neurocognitive and Autonomous Manifestations</b><br>At least 1 of the following 2 categories must apply: <ul style="list-style-type: none"> <li><input type="checkbox"/> The 2 following symptom groups must apply: <ul style="list-style-type: none"> <li><input type="checkbox"/> At least 1 of the following 6 points must apply: <b>V.20-22, V.24-25, V.28</b> ≥2</li> <li><input type="checkbox"/> The following point must apply: <b>V.26</b> Yes</li> </ul> </li> <li><input type="checkbox"/> At least 1 of the following 2 points must apply: <b>VI.37-38</b> ≥2</li> </ul> |
| <b>O</b>                                 | <b>Autonomic, Neuroendocrine, Immunologic Manifestations</b><br>At least 2 of the following 3 categories must apply: <ul style="list-style-type: none"> <li><input type="checkbox"/> At least 1 of the following 8 points must apply: <b>VI.35-42</b> ≥2</li> <li><input type="checkbox"/> At least 1 of the following 4 points must apply: <b>VII.43-46</b> ≥2</li> <li><input type="checkbox"/> At least 1 of the following 4 points must apply: <b>VIII.47-50</b>, ≥2</li> </ul>                                                                                                                                                                                                                                                              |                           | <b>Neuroendocrine, Immunologic Manifestations</b><br><i>Not included in IOM criteria</i>                                                                                                                                                                                                                                                                                                                                                                                                                                                                                                |

|                                                                       |                                                        |
|-----------------------------------------------------------------------|--------------------------------------------------------|
| <b>O Patient meets Canadian Consensus Criteria for ME/CFS</b>         | <b>O Patient meets IOM criteria for ME/CFS</b>         |
| <b>O Patient does not meet Canadian Consensus Criteria for ME/CFS</b> | <b>O Patient does not meet IOM criteria for ME/CFS</b> |

***In discussion with the patient & in the physician's letter, it must be pointed out that ME/CFS is a diagnosis of exclusion, which must be re-evaluated in case of new clinical aspects.***

<sup>1</sup> Carruthers, Bruce & Jain, Anil & Meirleir, Kenny & Peterson, Daniel & Klimas, Nancy & Lerner, A. & Bested, Alison & Flor-Henry, Pierre & Joshi, Pradip & Powles, Peter & Sherkey, Jeffrey & Sande, Marjorie. (2003). Myalgic Encephalomyelitis/Chronic Fatigue Syndrome. Journal Of Chronic Fatigue Syndrome. 11. 7-115. 10.1300/J092v11n01\_02.

<sup>2</sup> Clayton, Ellen. (2015). Beyond Myalgic Encephalomyelitis/Chronic Fatigue Syndrome An IOM Report on Redefining an Illness. JAMA. 313. 10.1001/jama.2015.1346.

\* In the original publication of Carruthers et al.<sup>1</sup> PEM requires a duration of >24 hours. However, according to the current state of international research, we recommend diagnosing PEM with a duration of ≥14 hours (see Cotler J et al. (2018) A Brief Questionnaire to Assess Post-Exertional Malaise. Diagnostics (Basel). 2018;8(3):66. Doi: 10.3390/diagnostics8030066 und Kedor, C., Freitag, H., Meyer-Arndt, L. et al. A prospective observational study of post-COVID-19 chronic fatigue syndrome following the first pandemic wave in Germany and biomarkers associated with symptom severity. Nat Commun 13, 5104 (2022). <https://doi.org/10.1038/s41467-022-32507-6>).

## Munich Berlin Symptom Questionnaire – Scoring Sheet for Children and Adolescents (0-17 Years of Age)

Only if frequency and severity are reported with  $\geq 2$ , the respective item counts positively for evaluation.

|                |                      |
|----------------|----------------------|
| Surname:       | Surname (physician): |
| Name:          | Name (physician):    |
| Date of birth: | Date (physician):    |
| Today's date:  | Institution:         |

| Pediatric Case Definition for ME/CFS by Jason et al. <sup>1</sup>                                                                                                                                                                                                                                                                                                                                                                                                                                                                                                                                                             | Clinical Diagnostic Worksheet by Rowe et al. <sup>2</sup>                                                                                                                                                                                                                                                                                                                                                                                                                                                                                                                                                                                 |
|-------------------------------------------------------------------------------------------------------------------------------------------------------------------------------------------------------------------------------------------------------------------------------------------------------------------------------------------------------------------------------------------------------------------------------------------------------------------------------------------------------------------------------------------------------------------------------------------------------------------------------|-------------------------------------------------------------------------------------------------------------------------------------------------------------------------------------------------------------------------------------------------------------------------------------------------------------------------------------------------------------------------------------------------------------------------------------------------------------------------------------------------------------------------------------------------------------------------------------------------------------------------------------------|
| <p><b>O</b> <b>Duration of Illness (Onset of the Symptoms: _____.____._____)</b><br/>The symptomatology is present for at least <b>3 months</b>.</p>                                                                                                                                                                                                                                                                                                                                                                                                                                                                          | <p><b>O</b> <b>Duration of Illness (Onset of the Symptoms: _____.____._____)</b><br/>The symptomatology is present for at least <b>3 months</b>.</p>                                                                                                                                                                                                                                                                                                                                                                                                                                                                                      |
| <p><b>O</b> <b>Medical History, Physical Examination and Differential Diagnostics</b><br/>did not indicate any other cause for the symptoms<br/><i>(in particular, no indications for untreated hypothyroidism, sleep apnea, narcolepsy, malignancies, leukemia, unresolved hepatitis, multiple sclerosis, juvenile rheumatoid arthritis, lupus erythematosus, HIV/AIDS, severe obesity (BMI greater than 40), celiac disease, lyme disease, childhood schizophrenia or psychiatric disorders, bipolar disorder, active alcohol or substance abuse, active anorexia nervosa or bulimia nervosa, depressive disorders)</i></p> | <p><b>O</b> <b>Medical History, Physical Examination and Differential Diagnostics</b><br/>did not indicate any other cause for the symptoms<br/><i>(in particular, no evidence of adrenocortical insufficiency, overtraining syndrome, GI disorders: Celiac disease, irritable bowel syndrome, eosinophilic gastroenteritis; Chiari malformation, cervical spinal stenosis, neuroborreliosis or other tick-borne disease, major depression, narcolepsy, obstructive or central sleep apnea, postcommotion syndrome, severe anemia, systemic lupus erythematosus and similar autoimmune disease, untreated hypo-/hyperthyroidism).</i></p> |
| <p><b>O</b> <b>Fatigue / Daily Function</b><br/>All of the following points must apply:<br/> <input type="checkbox"/> Fatigue: <b>I.1</b> <math>\geq 2</math><br/> <input type="checkbox"/> Limitations: all 3 points: <b>I.2-4</b> <math>\geq 2</math><br/> <input type="checkbox"/> Fatigue due to exertion: <b>I.6</b> No<br/> <input type="checkbox"/> Fatigue alleviated by rest: <b>I.7</b> No</p>                                                                                                                                                                                                                      | <p><b>O</b> <b>Fatigue / Daily Function</b><br/>All of the following points must apply:<br/> <input type="checkbox"/> Fatigue: <b>I.1</b> <math>\geq 2</math><br/> <input type="checkbox"/> Limitations: at least 1 of the 3 points: <b>I.2-4</b> <math>\geq 2</math><br/> <input type="checkbox"/> Fatigue due to exertion: <b>I.6</b> No<br/> <input type="checkbox"/> Fatigue alleviated by rest: <b>I.7</b> No</p>                                                                                                                                                                                                                    |
| <p><b>O</b> <b>Post-Exertional Symptoms</b><br/>All of the following points must apply:<br/> <input type="checkbox"/> loss of stamina; increased symptoms after everyday activities: all 2 points: <b>II.8-9</b> <math>\geq 2</math><br/> <input type="checkbox"/> duration of worsening of symptoms: <b>II.10</b> <math>\geq 14</math> hours</p>                                                                                                                                                                                                                                                                             | <p><b>O</b> <b>Post-Exertional Symptoms</b><br/>All of the following points must apply:<br/> <input type="checkbox"/> loss of stamina; increased symptoms after everyday activities: all 2 points: <b>II.8-9</b> <math>\geq 2</math><br/> <input type="checkbox"/> duration of worsening of symptoms: <b>II.10</b> <math>&gt; 24</math> hours</p>                                                                                                                                                                                                                                                                                         |

| Pediatric Case Definition for ME/CFS by Jason et al. <sup>1</sup>                                                                                                                                                                                                                                                                                                                                                                                       |  | Clinical Diagnostic Worksheet by Rowe et al. <sup>2</sup>                                                                                                                                                                                                                                                                                                                                                                                                                          |  |
|---------------------------------------------------------------------------------------------------------------------------------------------------------------------------------------------------------------------------------------------------------------------------------------------------------------------------------------------------------------------------------------------------------------------------------------------------------|--|------------------------------------------------------------------------------------------------------------------------------------------------------------------------------------------------------------------------------------------------------------------------------------------------------------------------------------------------------------------------------------------------------------------------------------------------------------------------------------|--|
| <input type="radio"/> <b>Sleep</b><br>At least 1 of the following 5 points must apply: <b>III.13-17</b> ≥2                                                                                                                                                                                                                                                                                                                                              |  | <input type="radio"/> <b>Sleep, Pain, and Neurocognitive Symptoms</b><br>At least 2 of the following 3 categories must apply:<br><input type="checkbox"/> At least 1 of the following 5 points must apply: <b>III.13-17</b> ≥2<br><input type="checkbox"/> At least 1 of the following 6 points must apply: <b>IV.18-21, IV.57, IV.59</b> ≥2<br><input type="checkbox"/> At least 1 of the following 8 points must apply: <b>V.23-25, V.27-28, V.30, V.33</b> ≥2; <b>V.29: Yes</b> |  |
| <input type="radio"/> <b>Pain</b><br>At least 1 of the following 4 points must apply: <b>IV.18-21</b> ≥2                                                                                                                                                                                                                                                                                                                                                |  |                                                                                                                                                                                                                                                                                                                                                                                                                                                                                    |  |
| <input type="radio"/> <b>Neurocognitive Manifestations</b><br>At least 2 of the following 11 points must apply: <b>V.23-25; V.27-28; V.30-35</b> ≥2                                                                                                                                                                                                                                                                                                     |  |                                                                                                                                                                                                                                                                                                                                                                                                                                                                                    |  |
| <input type="radio"/> <b>Autonomic, Neuroendocrine and Immunologic Manifestations</b><br>At least 2 of the following 3 categories must apply:<br><input type="checkbox"/> At least 1 of the following 5 points must apply: <b>VI.44-47; VI.51</b> ≥2<br><input type="checkbox"/> At least 1 of the following 4 points must apply: <b>VII.52-55</b> ≥2<br><input type="checkbox"/> At least 1 of the following 4 points must apply: <b>VIII.56-59</b> ≥2 |  | <input type="radio"/> <b>Autonomic, Neuroendocrine, and Immunologic Manifestations</b><br><i>Not included in the Clinical Diagnostic Worksheet by Rowe</i>                                                                                                                                                                                                                                                                                                                         |  |
| <input type="radio"/> Patient meets the Pediatric Case Definition for ME/CFS by Jason                                                                                                                                                                                                                                                                                                                                                                   |  | <input type="radio"/> Patient meets the Clinical Diagnostic Worksheet criteria for ME/CFS by Rowe                                                                                                                                                                                                                                                                                                                                                                                  |  |
| <input type="radio"/> Patient does not meet the Pediatric Case Definition for ME/CFS by Jason                                                                                                                                                                                                                                                                                                                                                           |  | <input type="radio"/> Patient does not meet the Clinical Diagnostic Worksheet criteria for ME/CFS by Rowe                                                                                                                                                                                                                                                                                                                                                                          |  |

***In the discussion with patients and parents as well as in the physician's letter it must be pointed out that ME/CFS is clinical diagnosis which must be re-evaluated in the case of new clinical aspects.***

<sup>1</sup>Jason, Leonard & Jordan, Karen & Miike, Teruhisa & Bell, David & Lapp, Charles & Torres-Harding, Susan & Rowe, Kathy & Gurwitt, Alan & Meirleir, Kenny & Hoof, Elke & Psych, Clin & Chairperson,. (2006). A Pediatric Case Definition for Myalgic Encephalomyelitis and Chronic Fatigue Syndrome. Journal Of Chronic Fatigue Syndrome. 13. 1-44. 10.1300/J092v13n02\_01.

<sup>2</sup>Rowe, Peter & Underhill, Rosemary & Friedman, Kenneth & Gurwitt, Alan & Medow, Marvin & Schwartz, Malcolm & Speight, Nigel & Stewart, Julian & Vallings, Rosamund & Rowe, Katherine. (2017). Myalgic Encephalomyelitis/Chronic Fatigue Syndrome Diagnosis and Management in Young People: A Primer. Frontiers in Pediatrics. 5. 10.3389/fped.2017.00121.

\* In the original publication by Rowe et al.<sup>2</sup> a duration of at least 6 months is required for the diagnosis. If the duration of the disease is <6 months, it is only recommended to express an urgent suspicion. We recommend a diagnosis in children and adolescents after a duration of 3 months in order to provide symptom-oriented care at an early stage.



## Munich Berlin Symptom Questionnaire – Additional Scoring Sheet for Adolescents (12-17 Years)

Only if frequency and severity are reported with  $\geq 2$ , the respective item enters positively into the evaluation.

|                |                      |
|----------------|----------------------|
| Surname:       | Surname (physician): |
| Name:          | Name (physician):    |
| Date of birth: | Date (physician):    |
| Today's date:  | Institution:         |

| Canadian Consensus Criteria <sup>3</sup> |                                                                                                                                                                                                                                                                                                                                                                                                                                                                                                                  | IOM Criteria <sup>4</sup> |                                                                                                                                                                                                                                                                                                                                                                                                                                       |
|------------------------------------------|------------------------------------------------------------------------------------------------------------------------------------------------------------------------------------------------------------------------------------------------------------------------------------------------------------------------------------------------------------------------------------------------------------------------------------------------------------------------------------------------------------------|---------------------------|---------------------------------------------------------------------------------------------------------------------------------------------------------------------------------------------------------------------------------------------------------------------------------------------------------------------------------------------------------------------------------------------------------------------------------------|
| <b>O</b>                                 | <b>Duration of Illness (Onset of the Symptoms: _____.____._____)</b><br>The symptomatology has been present for at least <b>3 months</b> .                                                                                                                                                                                                                                                                                                                                                                       | <b>O</b>                  | <b>Duration of Illness (Onset of the Symptoms: _____.____._____)</b><br>The symptomatology has been present for at least <b>3 months</b> .*                                                                                                                                                                                                                                                                                           |
| <b>O</b>                                 | <b>Medical History, Physical Examination and Differential Diagnostics</b><br><input type="checkbox"/> did not indicate any other cause for the symptoms<br><i>(in particular no indications for Addison's disease, Cushing's disease, hypo-/hyperthyroidism, anemia, hemochromatosis, diabetes mellitus, haemato-oncological, rheumatological and treatable sleep disorders)</i><br><br><input type="checkbox"/> The symptoms must have begun or have been significantly altered after the onset of the illness. | <b>O</b>                  | <b>Medical History, Physical Examination and Differential Diagnostics</b><br><input type="checkbox"/> did not indicate any other cause for the symptoms<br><br><input type="checkbox"/> The symptoms must have begun or have been significantly altered after the onset of the illness.                                                                                                                                               |
| <b>O</b>                                 | <b>Fatigue / Daily Function</b><br>All of the following points must apply:<br><input type="checkbox"/> Fatigue: <b>I.1</b> $\geq 2$<br><input type="checkbox"/> Limitations: at least 1 of the 3 points: <b>I.2-4</b> $\geq 2$<br><input type="checkbox"/> Fatigue new start: <b>I.5</b> Yes                                                                                                                                                                                                                     | <b>O</b>                  | <b>Fatigue / Daily Function</b><br>All of the following points must apply:<br><input type="checkbox"/> Fatigue: <b>I.1</b> $\geq 2$<br><input type="checkbox"/> Limitations: at least 1 of the 3 points: <b>I.2-4</b> $\geq 2$<br><input type="checkbox"/> Fatigue new start: <b>I.5</b> Yes<br><input type="checkbox"/> Fatigue due to exertion: <b>I.6</b> No<br><input type="checkbox"/> Fatigue alleviated by rest: <b>I.7</b> No |
| <b>O</b>                                 | <b>Post-Exertional Symptoms</b><br>All of the following points must apply:<br><input type="checkbox"/> loss of stamina; increased symptoms after everyday activities: all 2 points <b>II.8-9</b> $\geq 2$<br><input type="checkbox"/> duration of worsening of symptoms: <b>II.10</b> >24 hours                                                                                                                                                                                                                  | <b>O</b>                  | <b>Post-Exertional Symptoms</b><br>All of the following points must apply: all 2 points: <b>II.8-9</b> $\geq 2$                                                                                                                                                                                                                                                                                                                       |

| Canadian Consensus Criteria <sup>3</sup>                                                                                                                             |                                                                                                                                                                                                                                                                                                                                                                                                                                                                                                                                                                                                                                                                                                         | IOM Criteria <sup>4</sup>                                                                                                              |                                                                                                                                                                                                                                                                                                                                                                                                                                                                                           |
|----------------------------------------------------------------------------------------------------------------------------------------------------------------------|---------------------------------------------------------------------------------------------------------------------------------------------------------------------------------------------------------------------------------------------------------------------------------------------------------------------------------------------------------------------------------------------------------------------------------------------------------------------------------------------------------------------------------------------------------------------------------------------------------------------------------------------------------------------------------------------------------|----------------------------------------------------------------------------------------------------------------------------------------|-------------------------------------------------------------------------------------------------------------------------------------------------------------------------------------------------------------------------------------------------------------------------------------------------------------------------------------------------------------------------------------------------------------------------------------------------------------------------------------------|
| <input type="radio"/>                                                                                                                                                | <b>Sleep</b><br>At least 1 of the following 5 points must apply: <b>III.13-17</b> $\geq 2$                                                                                                                                                                                                                                                                                                                                                                                                                                                                                                                                                                                                              | <input type="radio"/>                                                                                                                  | <b>Sleep</b><br>The following point must apply: <b>III.13</b> $\geq 2$                                                                                                                                                                                                                                                                                                                                                                                                                    |
| <input type="radio"/>                                                                                                                                                | <b>Pain</b><br>At least 1 of the following 3 points must apply: <b>IV.18-20</b> $\geq 2$<br>( <i>except abdominal pain</i> )                                                                                                                                                                                                                                                                                                                                                                                                                                                                                                                                                                            | <input type="radio"/>                                                                                                                  | <b>Pain</b><br><i>Not included in IOM criteria</i>                                                                                                                                                                                                                                                                                                                                                                                                                                        |
| <input type="radio"/>                                                                                                                                                | <b>Neurocognitive Manifestations</b><br>At least 2 of the following symptom groups must apply:<br><input type="checkbox"/> Confusion: <b>V.22</b> $\geq 2$<br><input type="checkbox"/> Concentration and/or Memory: 1 of the following 2 points: <b>V.24-25</b> $\geq 2$<br><input type="checkbox"/> Orientation: <b>V.26</b> $\geq 2$<br><input type="checkbox"/> Comprehension and/or word-finding: 1 of the following 2 points: <b>V.27-28</b> $\geq 2$<br><input type="checkbox"/> Perception and overload phenomena: 1 of the following 5 points: <b>V.36, V.40-43</b> $\geq 2$<br><input type="checkbox"/> Coordination und muscular system: 1 of the following 3 points: <b>V.37-39</b> $\geq 2$ | <input type="radio"/>                                                                                                                  | <b>Neurocognitive and Autonomic Manifestations</b><br>At least 1 of the following 2 categories must apply:<br><input type="checkbox"/> The 2 following symptom groups must apply:<br><input type="checkbox"/> At least 1 of the following 6 points must apply: <b>V.23-25, V.27-28, V.37</b> $\geq 2$<br><input type="checkbox"/> The following point must apply: <b>V.29</b> , Yes<br><input type="checkbox"/> At least 1 of the following 2 points must apply: <b>VI.46-47</b> $\geq 2$ |
| <input type="radio"/>                                                                                                                                                | <b>Autonomic, Neuroendocrine, Immunologic Manifestations</b><br>At least 2 of the following 3 categories must apply:<br><input type="checkbox"/> At least 1 of the following 8 points must apply: <b>VI.44-51</b> $\geq 2$<br><input type="checkbox"/> At least 1 of the following 4 points must apply: <b>VII.52-55</b> $\geq 2$<br><input type="checkbox"/> At least 1 of the following 4 points must apply: <b>VIII.56-57, VIII.59-60</b> $\geq 2$                                                                                                                                                                                                                                                   | <input type="radio"/>                                                                                                                  | <b>Neuroendocrine, Immunologic Manifestations</b><br><i>Not included in IOM criteria</i>                                                                                                                                                                                                                                                                                                                                                                                                  |
| <input type="radio"/> Patient meets Canadian Consensus Criteria for ME/CFS<br><br><input type="radio"/> Patient does not meet Canadian Consensus Criteria for ME/CFS |                                                                                                                                                                                                                                                                                                                                                                                                                                                                                                                                                                                                                                                                                                         | <input type="radio"/> Patient meets IOM criteria for ME/CFS<br><br><input type="radio"/> Patient does not meet IOM criteria for ME/CFS |                                                                                                                                                                                                                                                                                                                                                                                                                                                                                           |

**In the discussion with patients and parents as well as in the physician's letter it must be pointed out that ME/CFS is clinical diagnosis which must be re-evaluated in the case of new clinical aspects.**

<sup>3</sup> Carruthers, Bruce & Jain, Anil & Meirleir, Kenny & Peterson, Daniel & Klimas, Nancy & Lerner, A. & Bested, Alison & Flor-Henry, Pierre & Joshi, Pradip & Powles, Peter & Sherkey, Jeffrey & Sande, Marjorie. (2003). Myalgic Encephalomyelitis/Chronic Fatigue Syndrome. Journal Of Chronic Fatigue Syndrome. 11. 7-115. 10.1300/J092v11n01\_02.

<sup>4</sup> Clayton, Ellen. (2015). Beyond Myalgic Encephalomyelitis/Chronic Fatigue Syndrome An IOM Report on Redefining an Illness. JAMA. 313. 10.1001/jama.2015.1346.

\* In the original publication by Clayton et al.<sup>4</sup> a duration of at least 6 months is required for the diagnosis. We recommend diagnosing children and adolescents after a disease duration of 3 months to provide them with symptom-oriented care at an early stage.
